# Supplementary material
Source: PubMed Central journal article supplement (PMC3869964)

**Supplementary Figure 1.** NkL-TAg cells were transfected with a construct expressing myc-SERTAD1 and stained with a myc tag antibody (Cell Signaling) (green). The nuclei were stained with DAPI (blue). The samples were examined using a Zeiss LSM 710 confocal microscope. Signals were detected in both the cytoplasm and nucleus.

Sup, Fig. 1. Jiao

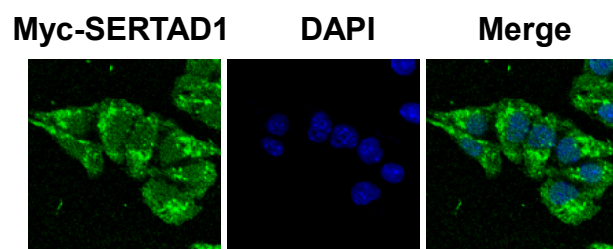

Supplement: NIHMS538443-supplement-01.pdf [file NIHMS538443-supplement-01.pdf]
